# Supplementary material
Source: PubMed Central journal article supplement (PMC8351230)
Supplement: 15006_2021_96_MOESM1_ESM.pdf [file 15006_2021_96_MOESM1_ESM.pdf]

**Literatur**

1. PCC. Summary for Policymakers - Global Warming of 1.5 oC; <https://www.ipcc.ch/sr15/chapter/spm/>
2. Robine, J.-M. et al. Death toll exceeded 70,000 in Europe during the summer of 2003. *C. R. Biol.* 2008;331, 171–178
3. an der Heiden, M. et al. Heat-Related Mortality: An Analysis of the Impact of Heatwaves in Germany Between 1992 and 2017. *Dtsch. Aerzteblatt Online* 2020; doi:10.3238/arztebl.2020.0603
4. B.C. records 486 sudden deaths, almost triple the usual number, during heat wave. *CBC News* 2021. <https://www.cbc.ca/news/canada/british-columbia/sudden-deaths-heat-wave-b-c-1.6086770>
5. Sweeney, K. G. Heat-Related Deaths. *J Insur Med.* 2002;34, 114–117
6. Byard, R. W. Heat-related deaths. *Forensic Sci. Med. Pathol.* 2013;9, 469–470
7. Day, E., Fankhauser, S., Kingsmill, N., Costa, H. & Mavrogianni, A. Upholding labour productivity under climate change: an assessment of adaptation options. *Clim. Policy* 2019;19, 367–385
8. Günster, C., Klauber, J., Robra, B.-P., Schmuker, C. & Schneider, A. Versorgungs-Report: Klima und Gesundheit. Medizinisch Wissenschaftliche Verlagsgesellschaft 2021; doi:10.32745/9783954666270
9. Gaupp, F., Hall, J., Mitchell, D. & Dadson, S. Increasing risks of multiple breadbasket failure under 1.5 and 2 °C global warming. *Agric. Syst.* 2019;175, 34–45
10. Kelley, C. P., Mohtadi, S., Cane, M. A., Seager, R. & Kushnir, Y. Climate change in the Fertile Crescent and implications of the recent Syrian drought. *Proc. Natl. Acad. Sci.* 2015;112, 3241–46
11. AFP Deutschland, 22.07.21; <https://www.youtube.com/watch?v=sthMS2lqm9Q>
